# Supplementary material for: Physical Characteristics and Cell-Adhesive Properties of In Vivo Fabricated Hyaluronan/Bacterial Cellulose Nanocomposites
Source: Research Square preprint supplement (doi:10.21203/rs.3.rs-1115449/v1), 2021-12-09
Supplement: Supplementary file 1 [file 310da069ca60425898b9fd37.docx]

**Physical characteristics and cell-adhesive property of *in* *vivo* fabricated hyaluronan / bacterial cellulose nanocomposites**

*Ryo Takahama*1*, Honami Kato*1*,* *Go* *Takayama*1, *Kenji Tajima*2 *and Tetsuo Kondo*1***

1 Graduate School of Bioresource and Bioenvironmental Sciences, Kyushu University.

West 5th, 744, Motooka, Nishi-ku, Fukuoka 819-0395, Japan.

2 Faculty of Engineering, Hokkaido University, N13W8, Kita-ku, Sapporo 060-8628, Japan.

*To whom correspondence should be addressed.

E-mail: tekondo@agr.kyushu-u.ac.jp, Tel/Fax +81-(0)92-802-4668,
ORCID: 0000-0003-4366-2955

takahama-bio@agr.kyushu-u.ac.jp (R. Takahama)

katohonami1358@icloud.com (H. Kato)

gotakayama@agr.kyushu-u.ac.jp (G. Takayama)

ktajima@eng.hokudai.ac.jp (K. Tajima)

tekondo@agr.kyushu-u.ac.jp (T. Kondo)

**Supporting information**


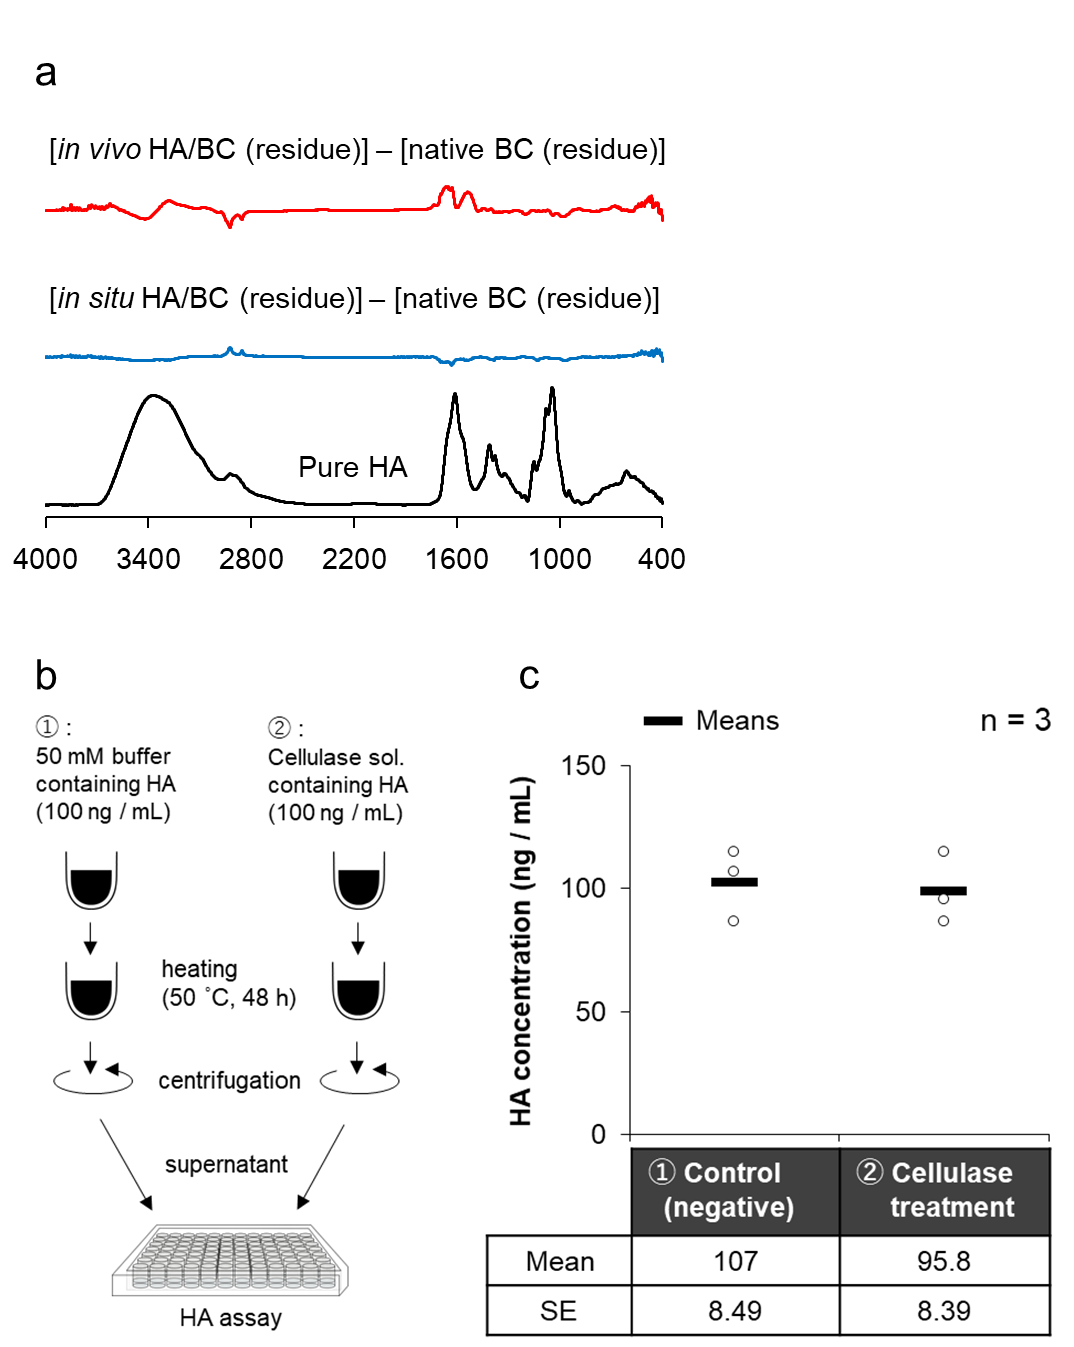


**Fig. S1.** (a) FT-IR difference spectra of the residues obtained after enzymatic degradation of pellicles by cellulase ONOZUKA R-10. (b, c) Illustration of the procedure (b) and the result (c) of negative control experiment, which assess the effect of cellulase treatment on ELISA-like HA assay and


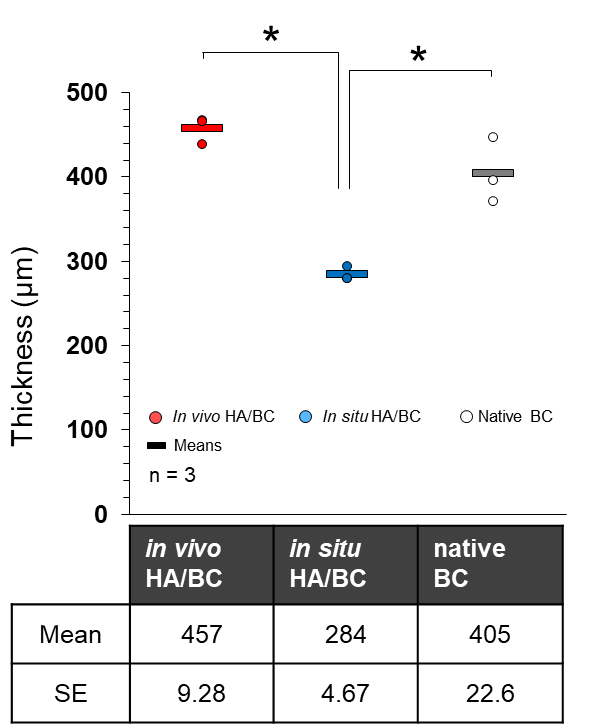


**Fig. S2.** The thicknesses of pellicles measured by CLSM. The values were compared statistically between groups using Tukey-Kramer test, with *p* < 0.05 considered as statistically significant (*).


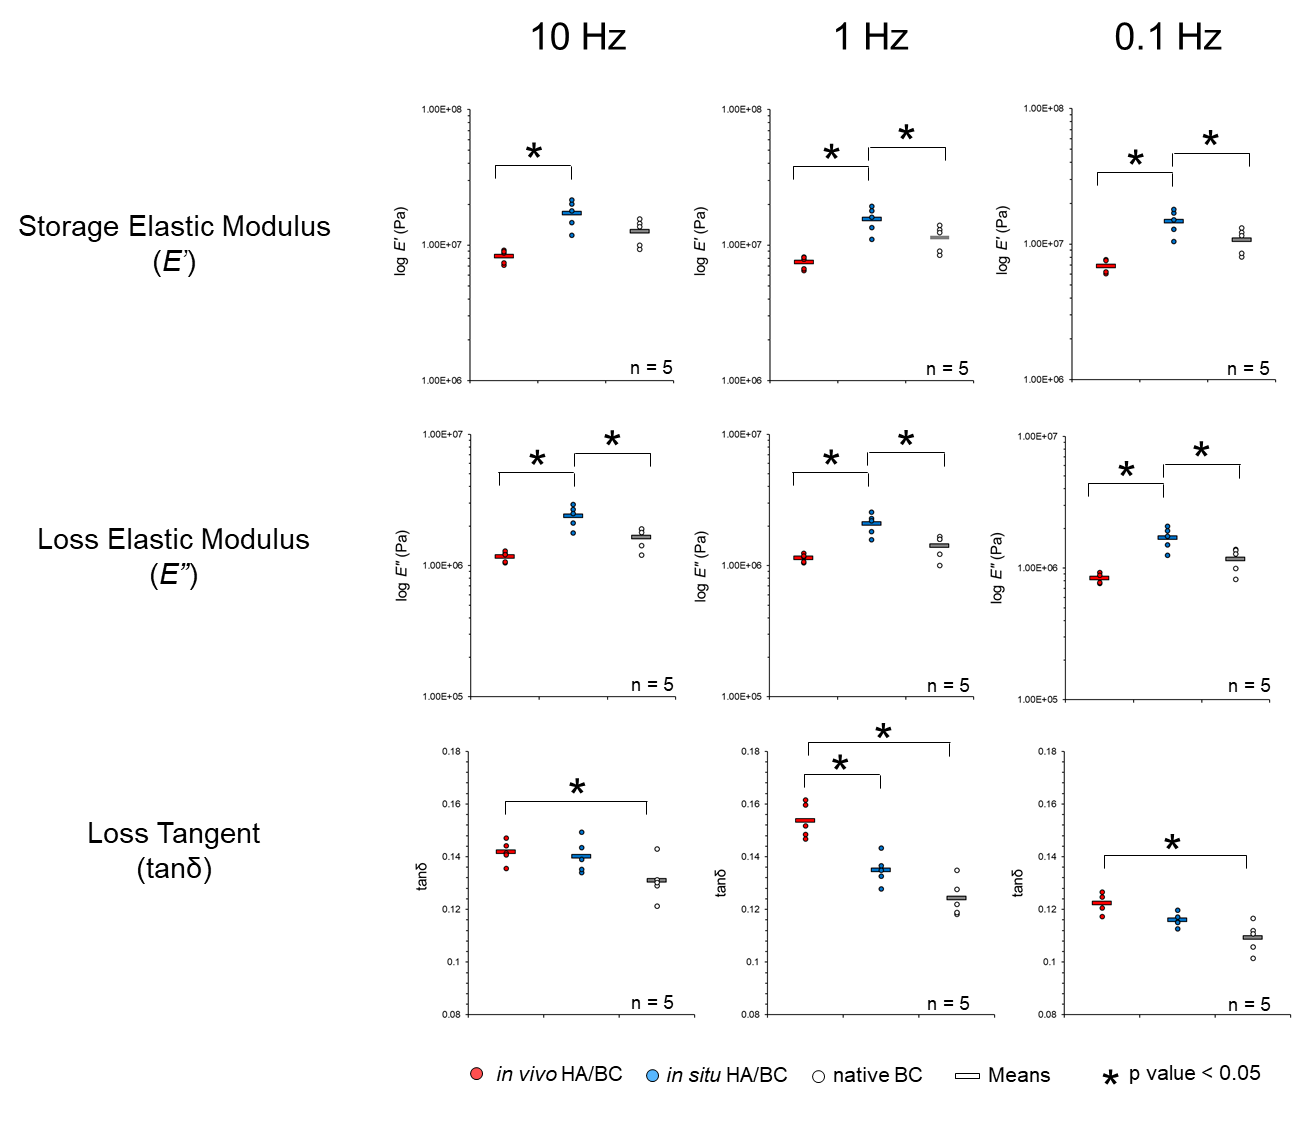


**Fig. S3**. Results of dynamic mechanical analysis in multiple frequency (10, 1, and 0.1 Hz). All measurements were conducted under water at 37˚C. The values were compared statistically between groups using Tukey-Kramer test, with *p* < 0.05 considered as statistically significant (*).


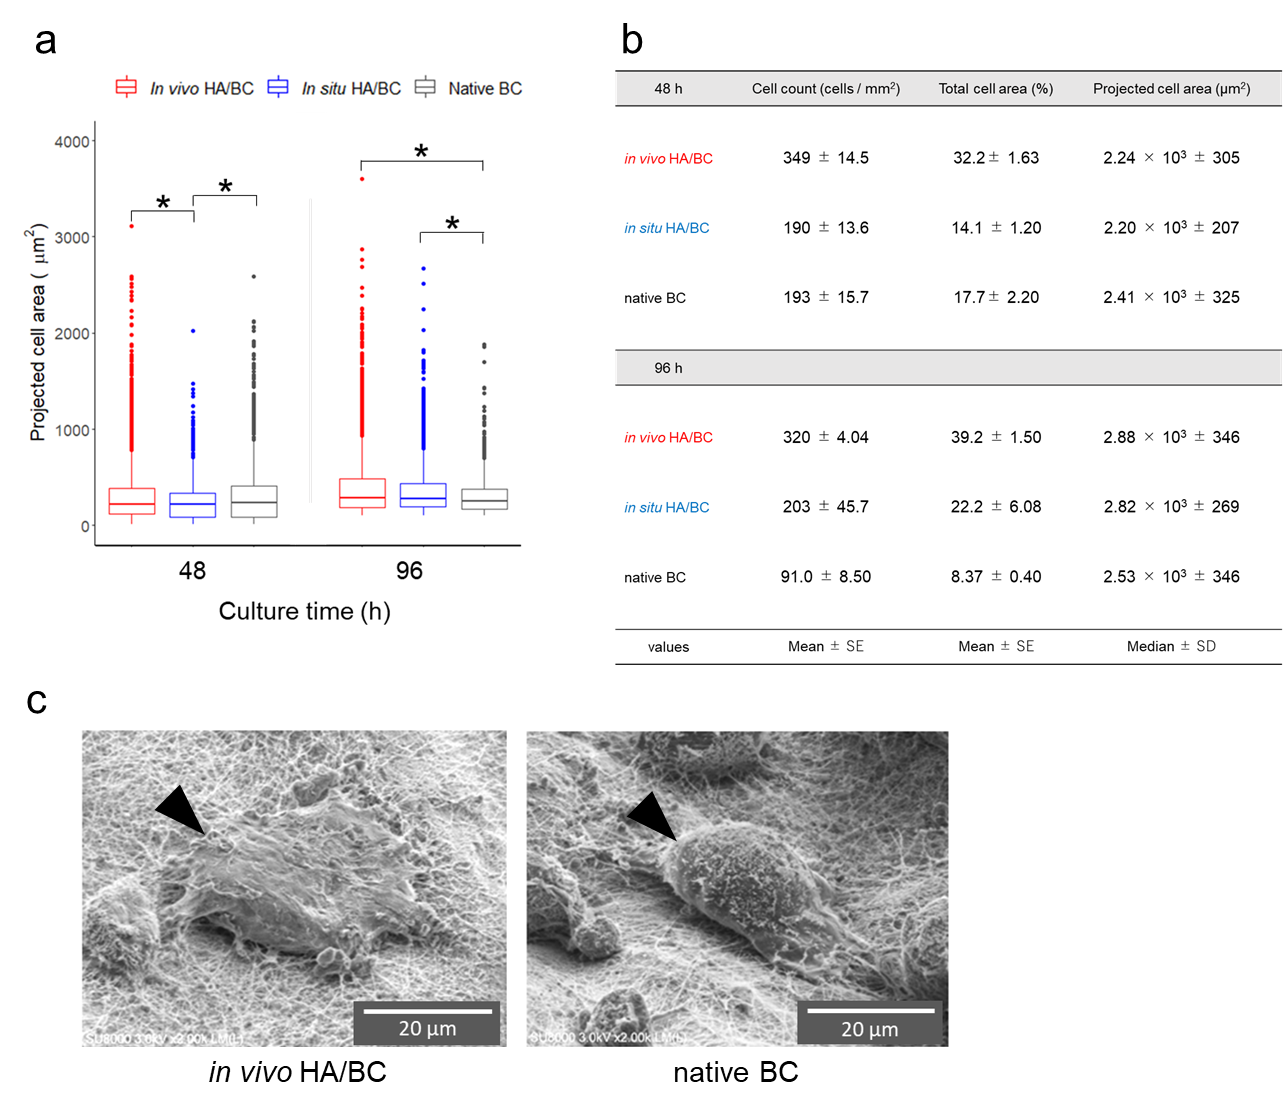


**Fig. S4.** (a) The projected areas of the individual normal human epidermal keratinocytes (NHEK) grown on the pellicle substrates. The values at culture periods of 48 h and 96 h were measured by CLSM. The values in each culture periods were compared statistically between groups using Tukey-Kramer test, with *p* < 0.05 considered as statistically significant (*). (c) FE-SEM images of NHEKs grown on the pellicle substrates.
